# Supplementary material for: The PPARΩPocket: Renewed Opportunities for Drug Development
Source: Hindawi journal article supplement (doi:10.1155/2020/9657380), 2020-07-01
Supplement: f1 [file 9657380.f1.pdf]

# Supplementary Material

## THE PPAR $\Omega$ POCKET: RENEWED OPPORTUNITIES FOR DRUG DEVELOPMENT

Åsmund Kaupang,<sup>a\*</sup> and Trond Vidar Hansen<sup>a</sup>

---

<sup>a</sup>Section for Pharmaceutical Chemistry, Department of Pharmacy, University of Oslo, 0316 Oslo, Norway.

\*Corresponding author; Tel.: +47 22 85 65 09; E-mail: [asmund.kaupang@farmasi.uio.no](mailto:asmund.kaupang@farmasi.uio.no), [asmundkaupang@gmx.com](mailto:asmundkaupang@gmx.com)

---

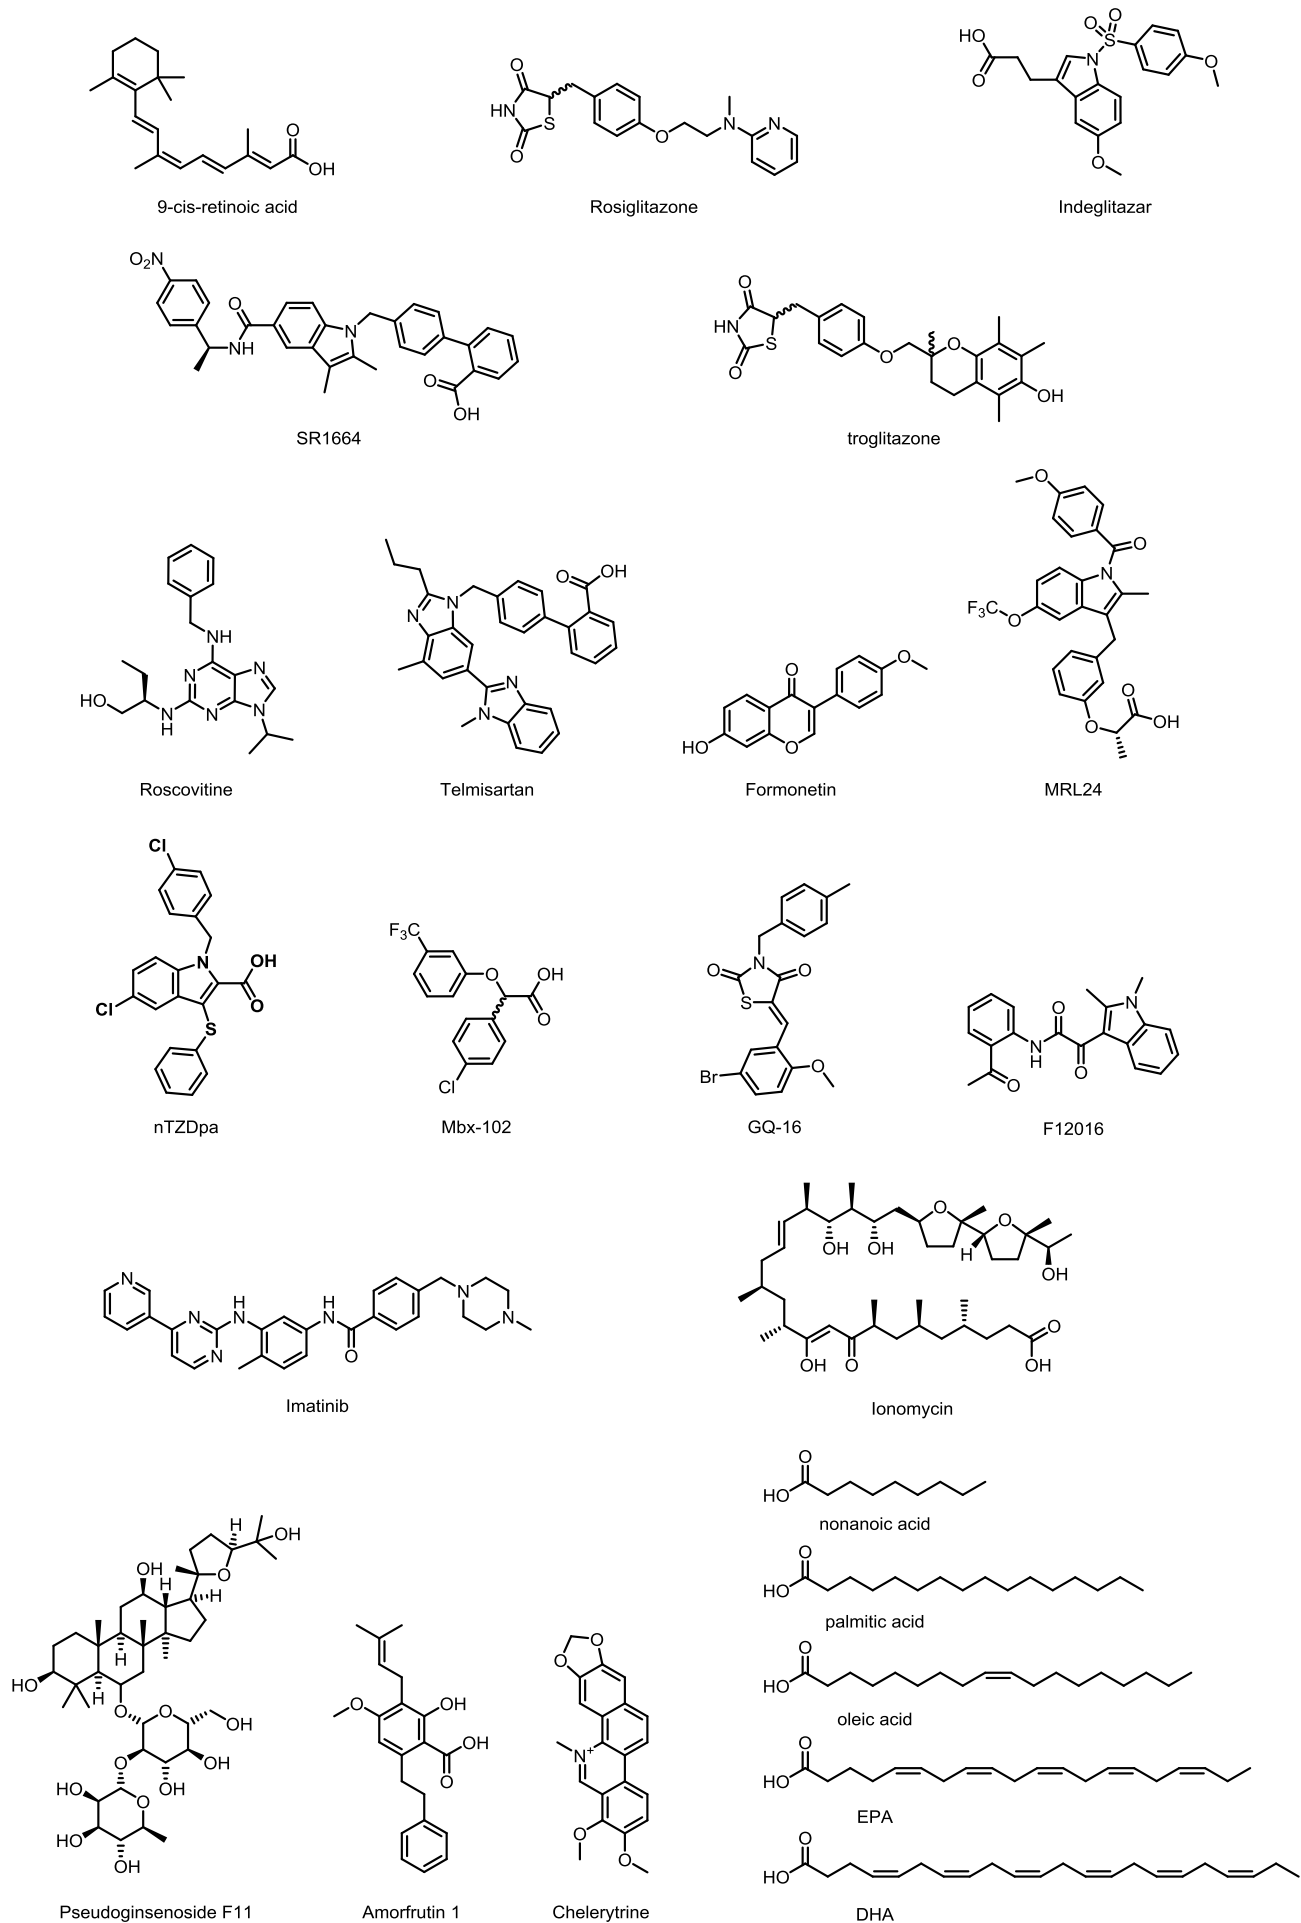

**Figure S1.** Chemical structures of PPAR $\gamma$  ligands and the Cdk inhibitor roscovitine.

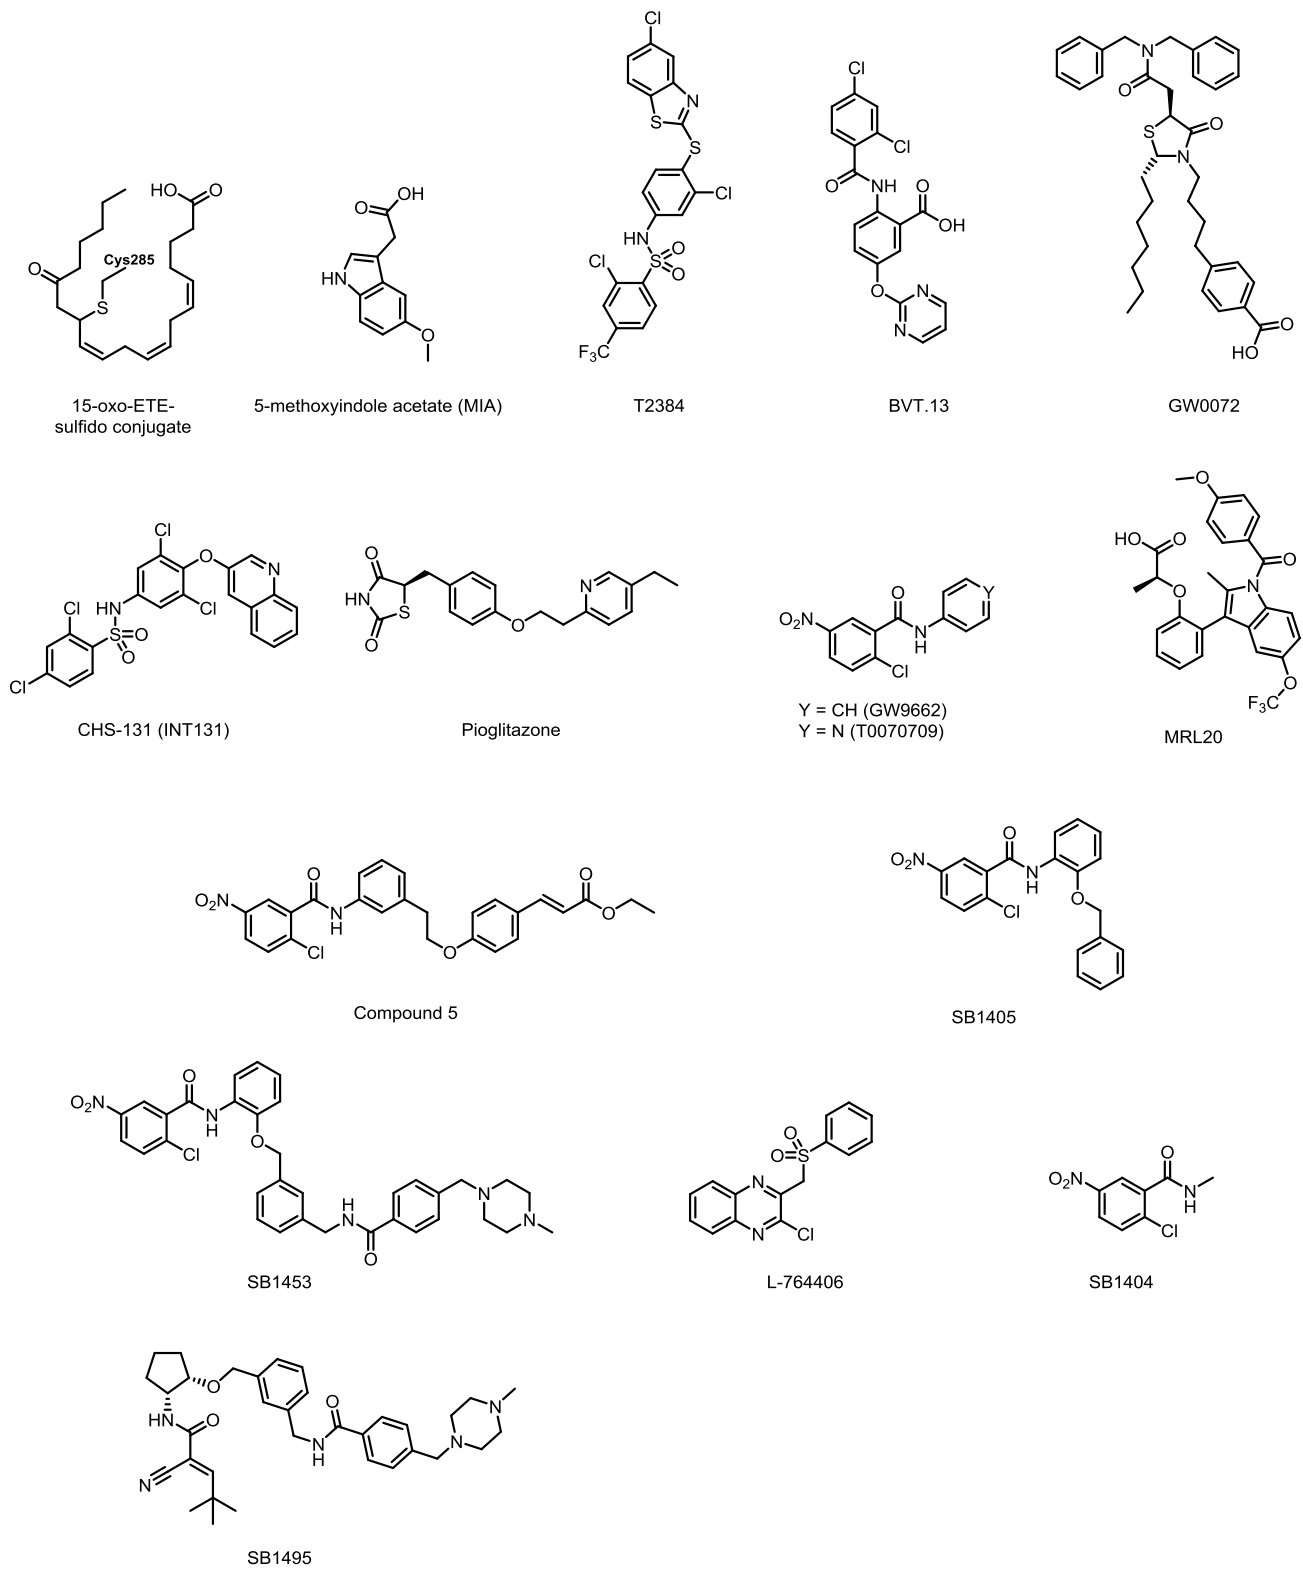

**Figure S2.** Chemical structures of PPAR $\gamma$  ligands.

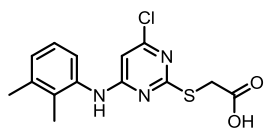

WY14643 (pirinixic acid)

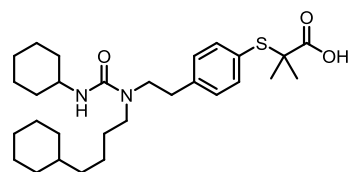

GW7647

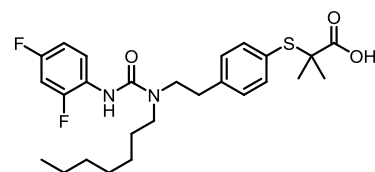

GW9578

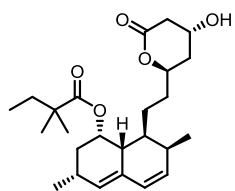

Simvastatin  
( $\delta$ -lactone form)

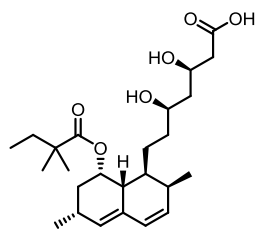

Simvastatin  
( $\beta,\delta$ -dihydroxy acid form)

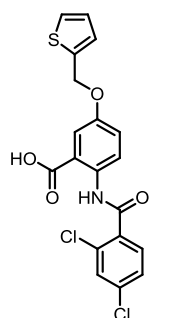

BVT.762 (Cpd. 5a)

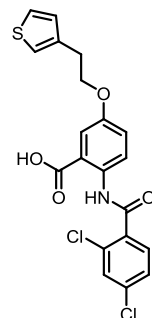

BVT.763 (Cpd. 5b)

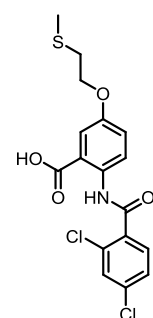

Compound 5d

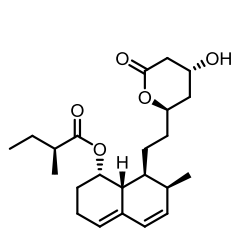

Mevastatin

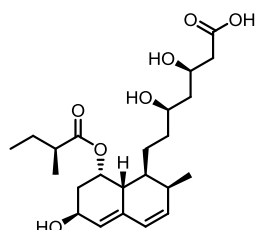

Pravastatin

**Figure S3.** Chemical structures of PPAR $\alpha$  ligands.

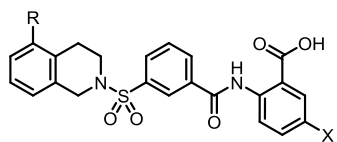

X = R = H (GW9371)  
 X = Cl, R = COOH (Compound 13)  
 X = Cl, R = OCH<sub>2</sub>COOH (Compound 14)

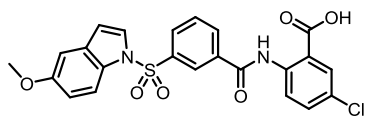

Compound 34

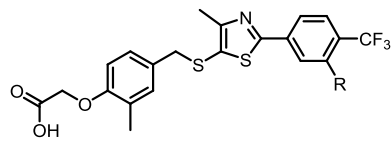

R = H (GW501516)  
 R = F (GW0742)

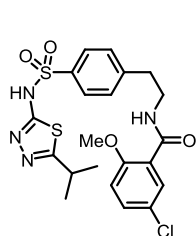

Compound 6

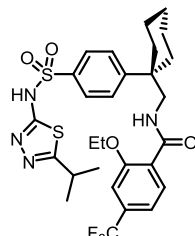

Compound 11j

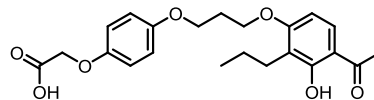

L-165,041

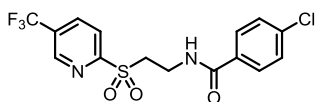

GSK3787

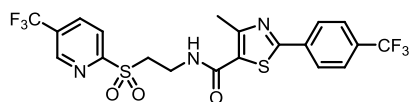

CC618

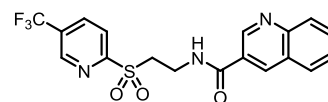

Compound 37

**Figure S4.** Chemical structures of PPARβ/δ ligands.
